# Supplementary material
Source: bioRxiv or medRxiv preprint supplement (https://www.biorxiv.org/highwire/filestream/69036/field_highwire_adjunct_files/5/216754-14.pdf)
Supplement: Supplementary file [file 216754-14.pdf]

Supplementary Table 5: Cancer driver genes and enrichment results of the smoking subnetwork ranked by number of modules each driver gene is participating in.

**Regulators**

|          | M11_BLCA | M65_BLCA | M15_BRCA | M46_COADREAD | M27_HNSC | M41_HNSC | M57_HNSC | M10_LUAD | M72_LUAD | M64_LUSC | M99_LUSC | M71_LUSC | M72_OV | M60_UCEC | M97_UCEC | # regulated modules |
|----------|----------|----------|----------|--------------|----------|----------|----------|----------|----------|----------|----------|----------|--------|----------|----------|---------------------|
| GPX2     | 1        | 1        | 0        | 0            | 1        | 0        | 1        | 1        | 0        | 1        | 1        | 0        | 0      | 0        | 1        | 8                   |
| ABCB6    | 1        | 0        | 0        | 0            | 0        | 0        | 0        | 0        | 0        | 0        | 1        | 1        | 0      | 0        | 0        | 3                   |
| SLC7A11  | 0        | 0        | 0        | 0            | 0        | 0        | 0        | 1        | 0        | 0        | 1        | 1        | 0      | 0        | 0        | 3                   |
| CYP4F3   | 0        | 0        | 0        | 0            | 0        | 0        | 0        | 0        | 0        | 1        | 1        | 1        | 0      | 0        | 0        | 3                   |
| GPC1     | 1        | 0        | 0        | 0            | 0        | 0        | 1        | 0        | 0        | 0        | 0        | 0        | 0      | 0        | 0        | 2                   |
| CBR1     | 1        | 0        | 0        | 0            | 1        | 0        | 0        | 0        | 0        | 0        | 0        | 0        | 0      | 0        | 0        | 2                   |
| NQO1     | 1        | 0        | 0        | 0            | 0        | 0        | 0        | 0        | 0        | 0        | 0        | 0        | 0      | 0        | 1        | 2                   |
| ZNF323   | 1        | 0        | 0        | 0            | 0        | 0        | 0        | 0        | 0        | 0        | 0        | 0        | 0      | 0        | 1        | 2                   |
| UBXN10   | 0        | 0        | 1        | 0            | 0        | 0        | 0        | 0        | 0        | 0        | 0        | 0        | 0      | 1        | 0        | 2                   |
| AKR1B1   | 0        | 0        | 0        | 0            | 1        | 0        | 0        | 0        | 1        | 0        | 0        | 0        | 0      | 0        | 0        | 2                   |
| ME1      | 0        | 0        | 0        | 0            | 1        | 0        | 0        | 0        | 0        | 0        | 0        | 0        | 0      | 0        | 1        | 2                   |
| RTT1     | 0        | 0        | 0        | 0            | 1        | 0        | 1        | 0        | 0        | 0        | 0        | 0        | 0      | 0        | 0        | 2                   |
| SLC47A2  | 0        | 0        | 0        | 0            | 1        | 0        | 0        | 0        | 0        | 1        | 0        | 0        | 0      | 0        | 0        | 2                   |
| UCHL1    | 0        | 0        | 0        | 0            | 0        | 0        | 1        | 0        | 1        | 0        | 0        | 0        | 0      | 0        | 0        | 2                   |
| GSR      | 0        | 0        | 0        | 0            | 0        | 0        | 0        | 1        | 1        | 0        | 0        | 0        | 0      | 0        | 0        | 2                   |
| ABCC2    | 0        | 0        | 0        | 0            | 0        | 0        | 0        | 1        | 1        | 0        | 0        | 0        | 0      | 0        | 0        | 2                   |
| KIAA1324 | 0        | 0        | 0        | 0            | 0        | 0        | 0        | 0        | 0        | 0        | 0        | 0        | 1      | 1        | 0        | 2                   |
| SPATA18  | 0        | 0        | 0        | 0            | 0        | 0        | 0        | 0        | 0        | 0        | 0        | 0        | 1      | 1        | 0        | 2                   |
| CAPS     | 0        | 0        | 0        | 0            | 0        | 0        | 0        | 0        | 0        | 0        | 0        | 0        | 1      | 1        | 0        | 2                   |
| AKR1B10  | 0        | 0        | 0        | 0            | 0        | 0        | 0        | 0        | 0        | 1        | 1        | 0        | 0      | 0        | 0        | 2                   |
| ABHD4    | 0        | 0        | 0        | 0            | 0        | 0        | 0        | 0        | 0        | 0        | 1        | 1        | 0      | 0        | 0        | 2                   |
| CYP4F11  | 0        | 0        | 0        | 0            | 0        | 0        | 0        | 0        | 0        | 0        | 1        | 1        | 0      | 0        | 0        | 2                   |
| SOST     | 0        | 0        | 0        | 0            | 0        | 0        | 0        | 0        | 0        | 0        | 1        | 1        | 0      | 0        | 0        | 2                   |

**Gene enrichment**

| Gene set                                     | M11_BLCA | M65_BLCA  | M15_BRCA   | M46_COADREAD | M27_HNSC | M41_HNSC | M57_HNSC | M10_LUAD  | M72_LUAD | M64_LUSC | M99_LUSC | M71_LUSC | M72_OV   | M60_UCEC | M97_UCEC | # significant enrichments | Averaged p-value |
|----------------------------------------------|----------|-----------|------------|--------------|----------|----------|----------|-----------|----------|----------|----------|----------|----------|----------|----------|---------------------------|------------------|
| NFE2L2.V2                                    | 2.95E-14 | 0.1205776 | 1          | 1            | 8.51E-12 | 1        | 1        | 1.05E-18  | 1        | 4.43E-02 | 8.39E-27 | 2.88E-07 | 1        | 1        | 4.25E-07 | 7                         | 1.44E-02         |
| 17115125-SuppTable2                          | 1.50E-14 | 1         | 1          | 1            | 4.25E-14 | 1        | 1        | 4.00E-20  | 1        | 1.97E-05 | 3.44E-16 | 1        | 1        | 1        | 2.50E-09 | 6                         | 3.29E-06         |
| 17115125-SuppTable4                          | 5.39E-09 | 1         | 1          | 1            | 1.35E-06 | 1        | 1        | 3.54E-11  | 1        | 2.86E-06 | 1        | 1        | 1        | 1        | 8.15E-03 | 5                         | 8.45E-07         |
| 19334046-Table3a                             | 8.54E-09 | 1         | 1          | 1            | 2.00E-06 | 1        | 1        | 5.71E-13  | 1        | 1        | 1        | 2.42E-05 | 1        | 1        | 4.06E-10 | 5                         | 5.24E-06         |
| OXIDOREDUCTASE_ACTIVITY                      | 1.88E-05 | 1         | 1          | 1            | 3.63E-05 | 1        | 1        | 3.66E-08  | 1        | 1        | 7.69E-07 | 1        | 1        | 1        | 9.32E-07 | 5                         | 1.14E-05         |
| 17115125-SuppTable6                          | 7.25E-07 | 1         | 1          | 1            | 1        | 1        | 1        | 3.36E-09  | 1        | 2.68E-06 | 1        | 1        | 1        | 1        | 2.36E-10 | 4                         | 8.51E-07         |
| ONDER_CDH1_TARGETS_1_UP                      | 1.07E-05 | 1         | 1          | 1            | 1.86E-05 | 1        | 1        | 3.24E-04  | 1        | 1        | 2.32E-04 | 1        | 1        | 1        | 1        | 4                         | 1.46E-04         |
| HALLMARK_XENOBIOTIC_METABOLISM               | 9.09E-05 | 1         | 1          | 1            | 2.80E-06 | 1        | 1        | 2.68E-03  | 1        | 1        | 2.86E-08 | 1        | 1        | 1        | 1        | 4                         | 6.95E-04         |
| 16491124-SuppTable1                          | 1        | 1         | 1          | 1            | 7.57E-04 | 1        | 1        | 1         | 1        | 1        | 1        | 1        | 1.05E-04 | 1.67E-05 | 1        | 3                         | 2.93E-04         |
| 19204204-SupplementaryTable2                 | 1        | 1         | 0.13208818 | 0.828638008  | 7.09E-06 | 2.22E-03 | 1        | 1         | 1        | 1        | 1        | 1        | 1        | 3.19E-04 | 1        | 3                         | 6.49E-02         |
| DOANE_BREAST_CANCER_ESR1_UP                  | 1        | 1         | 1          | 7.18E-04     | 1        | 1        | 1        | 1         | 1        | 1        | 1        | 1        | 9.96E-05 | 1.57E-05 | 1        | 3                         | 2.78E-04         |
| KAN_RESPONSE_TO_ARSENIC_TRIOXIDE             | 4.87E-06 | 1         | 1          | 1            | 8.48E-06 | 1        | 1        | 1.49E-04  | 1        | 1        | 1        | 1        | 1        | 1        | 1        | 3                         | 5.41E-05         |
| WOOD_EBV_EBNA1_TARGETS_UP                    | 2.47E-06 | 1         | 1          | 1            | 1        | 1        | 1        | 7.61E-05  | 1        | 1        | 8.45E-07 | 1        | 1        | 1        | 1        | 3                         | 2.65E-05         |
| 19306436-Table2b                             | 1        | 1         | 1.33E-02   | 3.02E-04     | 1        | 1        | 1        | 1         | 1        | 1        | 1        | 1        | 1        | 1        | 1        | 2                         | 6.82E-03         |
| 16115903-TableS1                             | 1        | 1         | 1          | 1.28E-02     | 1        | 1        | 1        | 1         | 1        | 1        | 1        | 1        | 1.33E-03 | 1        | 1        | 2                         | 7.07E-03         |
| 17115125-SuppTable3                          | 8.99E-11 | 1         | 1          | 1            | 1        | 1        | 1        | 1.48E-14  | 1        | 1        | 1        | 1        | 1        | 1        | 1        | 2                         | 4.50E-11         |
| 19489030-SuppTable4                          | 1.55E-05 | 1         | 1          | 1            | 1        | 1        | 1        | 1         | 1        | 2.62E-11 | 1        | 1        | 1        | 1        | 1        | 2                         | 7.76E-06         |
| 18662380-S3-ESR1                             | 1        | 1         | 1          | 1.14E-04     | 1        | 1        | 1        | 1         | 1        | 1        | 1        | 1        | 2.58E-02 | 1        | 1        | 2                         | 1.86E-02         |
| 17603561-S-Table1                            | 1        | 1         | 1          | 1.72E-02     | 1        | 1        | 1        | 1         | 1        | 1        | 1        | 1        | 7.53E-05 | 1        | 1        | 2                         | 8.65E-03         |
| 16912175-SuppTable3b                         | 1        | 1         | 1          | 2.01E-04     | 1        | 1        | 1        | 1         | 1        | 1        | 1        | 1        | 1        | 4.18E-02 | 1        | 2                         | 2.10E-02         |
| 19204204-SupplementaryTable6                 | 1        | 1         | 4.21E-02   | 1            | 2.00E-02 | 1        | 1        | 1         | 1        | 1        | 1        | 1        | 1        | 1        | 1        | 2                         | 3.11E-02         |
| 19204204-SupplementaryTable3                 | 1        | 1         | 4.01E-02   | 1            | 1.95E-02 | 1        | 1        | 1         | 1        | 1        | 1        | 1        | 1        | 1        | 1        | 2                         | 3.02E-02         |
| LIU_PROSTATE_CANCER_DN                       | 1        | 1         | 5.86E-03   | 1            | 1        | 1.53E-02 | 1        | 1         | 1        | 1        | 1        | 1        | 1        | 1        | 1        | 2                         | 1.06E-02         |
| SENGUPTA_NASOPHARYNGEAL_CARCINOMA_DN         | 1        | 1         | 1          | 2.88E-03     | 1        | 1        | 1        | 1         | 1        | 1        | 1        | 1        | 1        | 2.49E-03 | 1        | 2                         | 2.69E-03         |
| RUTELLA_RESPONSE_TO_HGF_UP                   | 1        | 1         | 1          | 1            | 1.21E-02 | 1        | 1        | 0.1845591 | 1        | 1        | 8.48E-03 | 1        | 1        | 1        | 1        | 2                         | 2.26E-02         |
| RUTELLA_RESPONSE_TO_HGF_VS_CSF2RB_AND_IL4_UP | 1        | 1         | 1          | 1            | 1.05E-02 | 1        | 1        | 0.1610243 | 1        | 1        | 7.22E-03 | 1        | 1        | 1        | 1        | 2                         | 1.96E-02         |
| CARBOXYLIC_ACID_METABOLIC_PROCESS            | 1        | 1         | 1          | 1            | 1        | 1        | 1        | 1.35E-03  | 1        | 1        | 5.37E-07 | 1        | 1        | 1        | 1        | 2                         | 6.75E-04         |
| ORGANIC_ACID_METABOLIC_PROCESS               | 1        | 1         | 1          | 1            | 1        | 1        | 1        | 1.44E-03  | 1        | 1        | 5.90E-07 | 1        | 1        | 1        | 1        | 2                         | 7.21E-04         |
